# Supplementary material for: Biostable Shape Memory Polymer Foams for Smart Biomaterial Applications
Source: MDPI journal article supplement (doi:10.3390/polym13234084), 2021-11-24
Supplement: s1 [file s1]

Supplementary Materials for:

# Biostable Shape Memory Polymer Foams for Smart Biomaterial Applications

Anand Utpal Vakil, Natalie Marie Petryk, Ellen Shepherd and Mary Beth B. Monroe \*

Department of Biomedical and Chemical Engineering, Syracuse Biomaterials Institute, and BioInspired Syracuse: Institute for Material and Living Systems, Syracuse University, Syracuse, NY 13244, USA; [auvakil@syr.edu](mailto:auvakil@syr.edu) (A.U.V.); [nmpetryk@syr.edu](mailto:nmpetryk@syr.edu) (N.M.P.); [eshepher@syr.edu](mailto:eshepher@syr.edu) (E.S.)

\* Correspondence: [mbmonroe@syr.edu](mailto:mbmonroe@syr.edu); Tel.: +1-315-443-3323

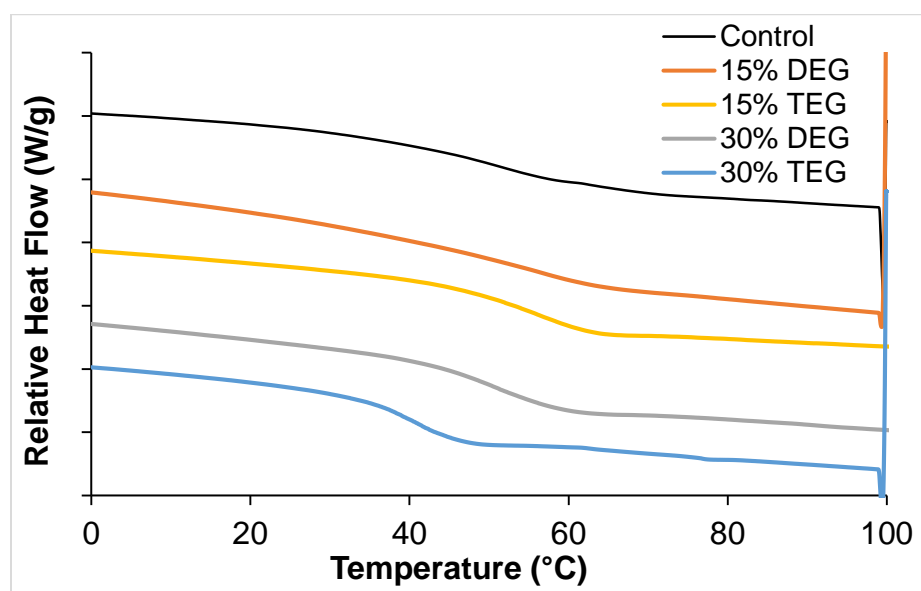

**Figure S1.** Representative differential scanning calorimetry traces for synthesized materials in the dry state. Glass transition temperatures were taken as the half-height transition of the endothermic shift in the data.

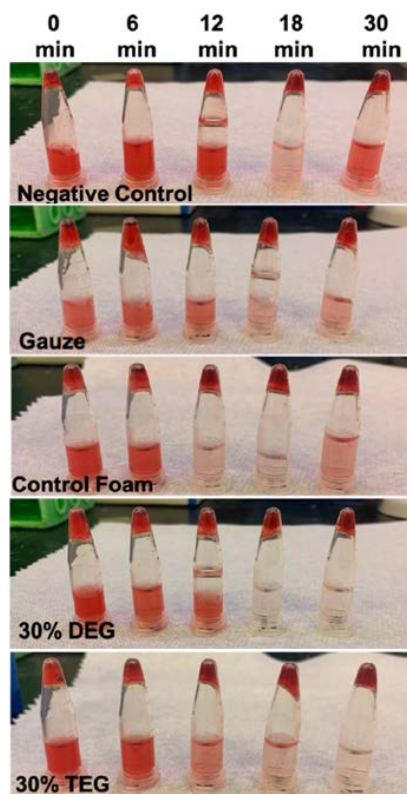

**Figure S2.** Representative images of lysates from coagulation time assay. Negative control contains empty tube with no samples.
